# Supplementary material for: Corticosterone Administration Alters White Matter Tract Structure and Reduces Gliosis in the Sub-Acute Phase of Experimental Stroke
Source: MDPI journal article supplement (doi:10.3390/ijms22136693), 2021-06-22
Supplement: s1 [file s1]

## SUPPLEMENTARY MATERIAL

### Corticosterone administration alters white matter tract structure and reduces gliosis in the sub-acute phase of experimental stroke

Katarzyna Zalewska, Rebecca J Hood, Giovanni Pietrogrande, Sonia Sanchez-Bezanilla, Lin Kooi Ong, Sarah J Johnson, Kaylene M Young, Michael Nilsson & Frederick R Walker

#### Supplementary figures

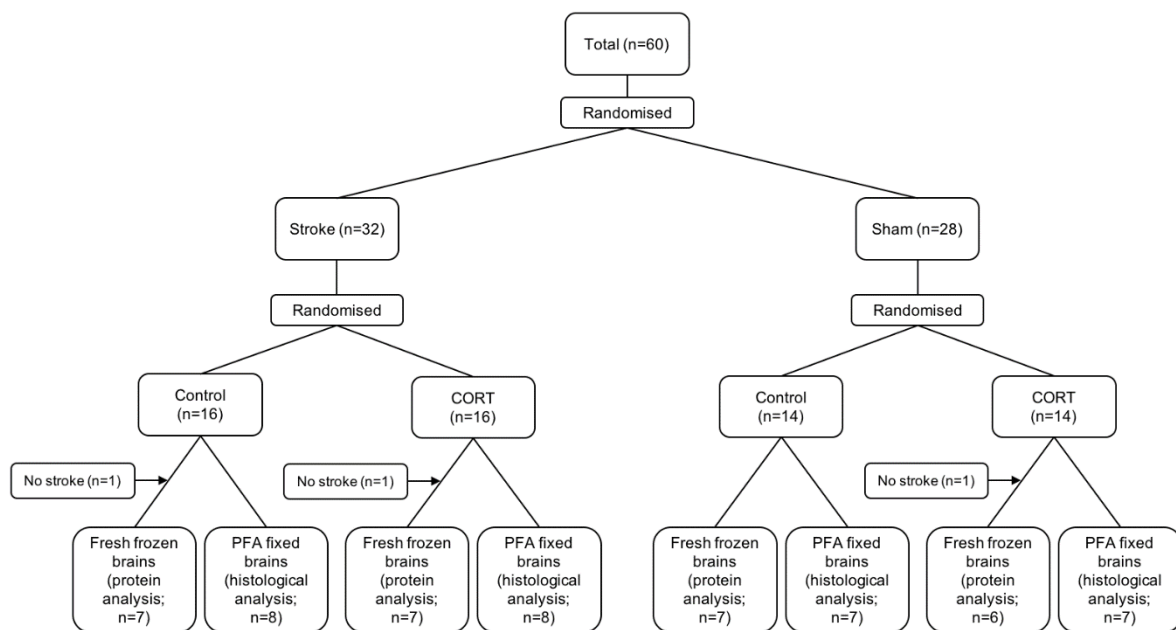

**Supplementary Figure S1. Experimental Design – Inclusions/Exclusions.** Diagram for inclusion and exclusion of mice in this study.

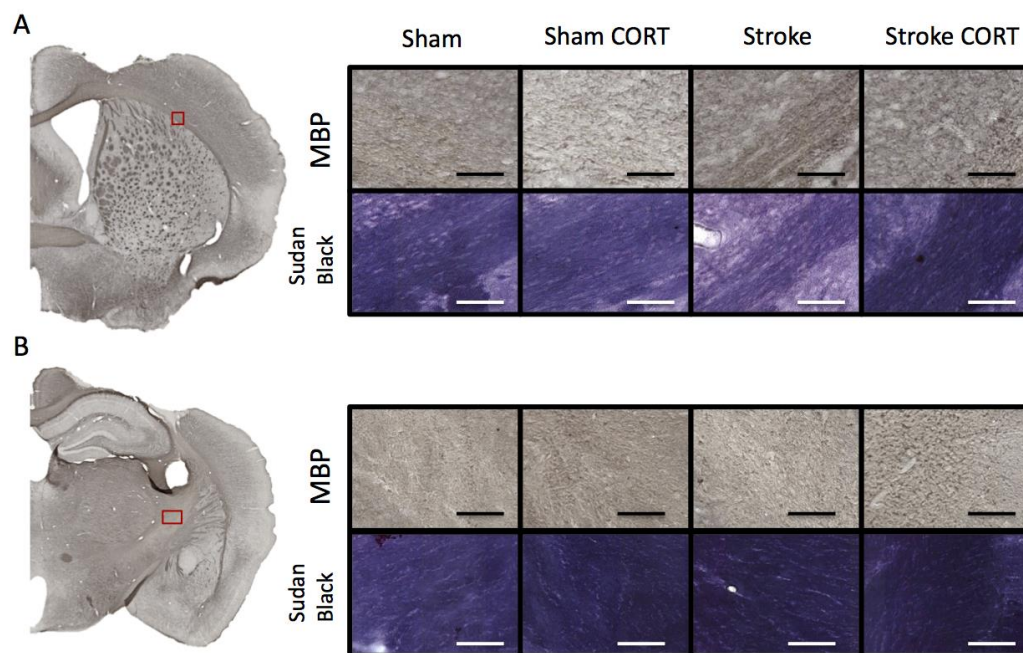

**Supplementary Figure S2. Changes in myelin structure after stroke and CORT administration.** (A) represents staining for MBP in CC with location of cropped region. Right Panel shows staining of MBP and Sudan Black from cropped region throughout different groups. Scale Bar = 75  $\mu$ m for MBP and 100  $\mu$ m for Sudan Black. (B) shows representative staining for MBP in CST region. Right Panel shows staining of MBP and Sudan Black from cropped region throughout different groups. Scale Bar = 100  $\mu$ m for MBP and 150  $\mu$ m for Sudan Black.

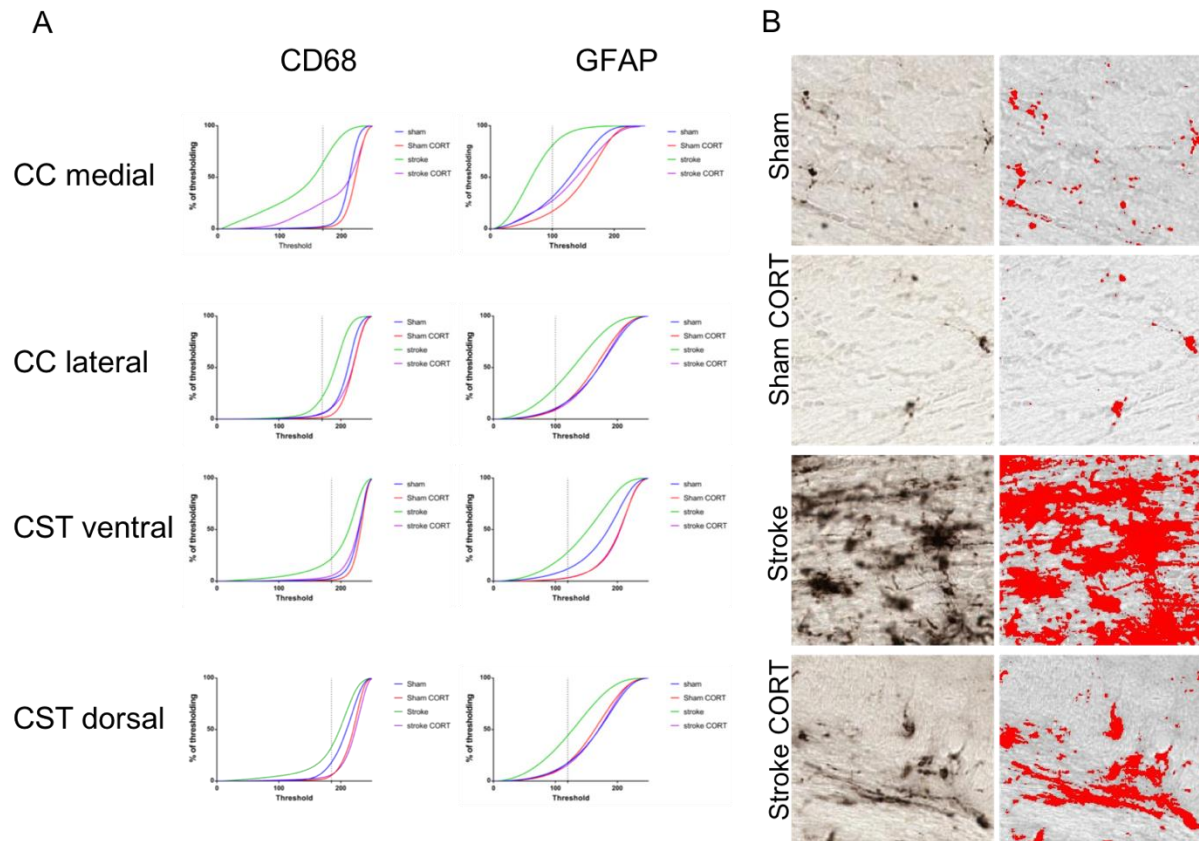

**Supplementary Figure S3. The cumulative threshold spectra graphs.** (A) shows cumulative threshold graphs for 2 regions of CC and 2 regions of CST for CD68 and GFAP. Dotted line represents pixel intensity which was used for further analyses. (B) shows representative CD68 staining from the CC region A. Right panel shows thresholding at PI = 170.
